# Supplementary material for: The Clinical Characteristics and Prognostic Factors of Primary Extramammary Paget’s Disease Treated with Surgery in Anogenital Regions: A Large Population Study from the SEER Database and Our Centre
Source: MDPI journal article supplement (doi:10.3390/jcm12020582), 2023-01-11
Supplement: s1 [file s1]

**Table S1.** SEER baseline

| Variables                     | Overall       |
|-------------------------------|---------------|
| N                             | 688           |
| Age (mean (SD))               | 69.68 (11.36) |
| Age65 (%)                     |               |
| <65                           | 237 (34.45)   |
| >65                           | 451 (65.55)   |
| Sex (%)                       |               |
| Female                        | 502 (72.97)   |
| Male                          | 186 (27.03)   |
| Year2005 (%)                  |               |
| <2005                         | 318 (46.22)   |
| >2005                         | 370 (53.78)   |
| Races (%)                     |               |
| American Indian/Alaska Native | 478 (69.48)   |
| Asianor Pacific Islander      | 4 (0.58)      |
| Black                         | 199 (28.92)   |
| Unknown                       | 3 (0.44)      |
| White                         | 4 (0.58)      |
| SEER stage (%)                |               |
| Localized                     | 542 (78.78)   |
| Regional                      | 110 (15.99)   |
| Distant                       | 11 (1.60)     |
| NA                            | 25 (3.63)     |
| Status of lymph nodes         |               |
| N+                            | 17 (2.47)     |
| NA                            | 671 (97.53)   |
| Diameter (cm)                 |               |
| 0-5                           | 231 (33.58)   |
| 5-10                          | 53 (7.70)     |

|                             |             |
|-----------------------------|-------------|
| >10                         | 14 (2.03)   |
| NA                          | 390 (56.69) |
| Hispanic                    |             |
| Non-Spanish-Hispanic-Latino | 635 (92.30) |
| Spanish-Hispanic-Latino     | 53 (7.70)   |
| Sites of EMPD (%)           |             |
| Anus                        | 22 (3.20)   |
| Penis                       | 20 (2.91)   |
| Scrotum                     | 151 (21.95) |
| Vagina                      | 3 (0.44)    |
| Vulva                       | 492 (71.51) |

---

**Table S2.** EMPD baseline

| Variables            | Overall      |
|----------------------|--------------|
| N                    | 176          |
| Age (mean (SD))      | 65.81 (9.57) |
| Age (%)              |              |
| <65                  | 79 (44.89)   |
| >65                  | 97 (55.11)   |
| BMI (mean (SD))      | 24.41 (3.17) |
| BMI (%)              |              |
| <25                  | 103 (58.52)  |
| >25                  | 73 (41.48)   |
| Sex (%)              |              |
| Male                 | 157 (89.20)  |
| Female               | 19 (10.80)   |
| ASA                  |              |
| 1-2                  | 152 (86.36)  |
| 3-4                  | 24 (13.64)   |
| Comorbidity (%)      |              |
| No                   | 78 (44.32)   |
| Yes                  | 98 (55.68)   |
| SEER stage (%)       |              |
| Localized            | 134 (76.14)  |
| Regional             | 40 (22.73)   |
| Distant              | 2 (1.14)     |
| Sites of EMPD (%)    |              |
| Vulva                | 19 (10.80)   |
| Penis                | 16 (9.09)    |
| Scrotum              | 141 (80.11)  |
| Diameter (mean (SD)) | 6.41 (2.91)  |
| Diameter (cm)        |              |
| <5                   | 81 (46.02)   |
| 5-10                 | 80 (45.45)   |
| >10                  | 14 (7.95)    |
| NA                   | 1 (0.57)     |
| Margin (%)           |              |
| Negative             | 144 (81.82)  |
| Positive             | 31 (17.61)   |
| NA                   | 1 (0.57)     |
| Lymphadenectomy(%)   |              |
| No                   | 168 (95.45)  |

|                       |             |
|-----------------------|-------------|
| Yes                   | 8 (4.55)    |
| Status of lymph nodes |             |
| N+                    | 6 (3.41)    |
| NA                    | 170 (96.59) |
| Invasion level (%)    |             |
| Level1                | 133 (75.57) |
| Level2                | 12 (6.82)   |
| Level3                | 31 (17.61)  |
| LVI (%)               |             |
| No                    | 172 (97.73) |
| Yes                   | 4 (2.27)    |
| Chemotherapy (%)      |             |
| No                    | 171 (97.16) |
| Yes                   | 5 (2.84)    |
| Radiation (%)         |             |
| No                    | 105 (59.66) |
| Yes                   | 71 (40.34)  |
| Reconstruction (%)    |             |
| Direct closure        | 67 (38.07)  |
| Free skin flaps       | 24 (13.64)  |
| Skin grafting         | 85 (48.30)  |
| Surgical type (%)     |             |
| WLE                   | 44 (25.00)  |
| MMS                   | 132 (75.00) |
| Intervals             |             |
| <2 year               | 65 (36.93)  |
| >2 year               | 111 (63.07) |

---
